# Supplementary material for: Substantial risk of recurrence even after 5 recurrence-free years in early-stage hepatocellular carcinoma patients
Source: PubMed Central journal article supplement — Clin Mol Hepatol. 2020 Sep 11;26(4):516–28. doi: 10.3350/cmh.2020.0016 (PMC7641570; doi:10.3350/cmh.2020.0016), 2020-09-11
Supplement: cmh-2020-0016-suppl2.pdf [file cmh-2020-0016-suppl2.pdf]

**Supplementary Table 2.** Comparison of baseline characteristics according to the treatment modality

| Variable                | RFA (n=649) | Resection (n=789)* | P-value |
|-------------------------|-------------|--------------------|---------|
| Age (years)             |             |                    | <0.001  |
| <60                     | 384 (59.2)  | 551 (69.8)         |         |
| ≥60                     | 265 (40.8)  | 238 (30.2)         |         |
| Male                    | 507 (78.1)  | 628 (79.6)         | 0.516   |
| Diabetes                | 165 (25.4)  | 115 (14.6)         | <0.001  |
| Etiology                |             |                    | <0.001  |
| HBV                     | 485 (74.7)  | 654 (82.9)         |         |
| Others                  | 164 (25.3)  | 135 (17.1)         |         |
| Liver cirrhosis         | 415 (63.9)  | 271 (34.3)         | <0.001  |
| Child-Pugh score        |             |                    | 0.073   |
| 5                       | 492 (75.8)  | 630 (79.8)         |         |
| 6                       | 157 (24.2)  | 159 (20.2)         |         |
| ALBI grade              |             |                    | <0.001  |
| 1                       | 337 (51.9)  | 493 (62.5)         |         |
| 2                       | 312 (48.1)  | 296 (37.5)         |         |
| FIB-4 score             |             |                    | <0.001  |
| <1.45                   | 57 (8.8)    | 188 (23.8)         |         |
| ≥1.45 and <3.25         | 230 (35.4)  | 392 (49.7)         |         |
| ≥3.25                   | 362 (55.8)  | 209 (26.5)         |         |
| Fibrosis degree         |             |                    | N/A     |
| No or mild fibrosis     | N/A         | 108 (13.7)         |         |
| Advanced fibrosis       | N/A         | 321 (40.7)         |         |
| Cirrhosis               | N/A         | 360 (45.6)         |         |
| AFP (ng/mL)             |             |                    | 0.482   |
| <10                     | 265 (40.8)  | 307 (38.9)         |         |
| ≥10                     | 384 (59.2)  | 482 (61.1)         |         |
| Tumor number            |             |                    | <0.001  |
| Single                  | 565 (87.1)  | 757 (95.9)         |         |
| Two                     | 74 (11.4)   | 28 (3.5)           |         |
| Three                   | 10 (1.5)    | 4 (0.5)            |         |
| Maximal tumor size (cm) |             |                    | <0.001  |
| ≤2                      | 431 (66.4)  | 194 (24.6)         |         |
| >2 and ≤5               | 218 (33.6)  | 467 (59.2)         |         |
| >5                      | 0 (0.0)     | 128 (16.2)         |         |
| BCLC stage              |             |                    | <0.001  |
| 0                       | 303 (46.7)  | 139 (17.6)         |         |
| A                       | 346 (53.3)  | 650 (82.4)         |         |

RFA, radiofrequency ablation; HBV, hepatitis B virus; ALBI, albumin-bilirubin; FIB-4 score, fibrosis-4 score; AFP, alpha-fetoprotein; BCLC, Barcelona Clinic Liver Cancer.

\*Thirteen patients who received both RFA and resection were excluded from this analysis.
