# Supplementary material for: Substantial risk of recurrence even after 5 recurrence-free years in early-stage hepatocellular carcinoma patients
Source: PubMed Central journal article supplement — Clin Mol Hepatol. 2020 Sep 11;26(4):516–28. doi: 10.3350/cmh.2020.0016 (PMC7641570; doi:10.3350/cmh.2020.0016), 2020-09-11
Supplement: cmh-2020-0016-suppl3.pdf [file cmh-2020-0016-suppl3.pdf]

**Supplementary Table 3.** Risk factors for recurrence within 5 years (among patients who received resection, n=802)

| Variable                               | Unadjusted       |         | Multivariable    |         |
|----------------------------------------|------------------|---------|------------------|---------|
|                                        | HR (95% CI)      | P-value | HR (95% CI)      | P-value |
| Age ≥60 vs. <60 (years)                | 1.05 (0.84–1.30) | 0.670   |                  |         |
| Male vs. female                        | 1.28 (0.98–1.66) | 0.066   | 1.27 (0.98–1.66) | 0.076   |
| Diabetes                               | 0.89 (0.67–1.19) | 0.426   |                  |         |
| HBV vs. others                         | 1.05 (0.80–1.38) | 0.735   |                  |         |
| Advanced fibrosis on histology* vs. no | 1.32 (0.96–1.83) | 0.091   | 1.57 (1.12–2.20) | 0.008   |
| ALBI grade 2 vs. 1                     | 1.14 (0.93–1.40) | 0.195   |                  |         |
| AFP ≥10 vs. <10 (ng/mL)                | 1.32 (1.07–1.63) | 0.009   | 1.38 (1.12–1.71) | 0.003   |
| Tumor number                           |                  |         |                  |         |
| Single                                 | Reference        |         |                  |         |
| Two                                    | 0.79 (0.46–1.35) | 0.384   |                  |         |
| Three                                  | 1.81 (0.45–7.26) | 0.403   |                  |         |
| Maximal tumor diameter (cm)            |                  |         |                  |         |
| ≤2                                     | Reference        |         |                  |         |
| >2 and ≤5                              | 1.45 (1.12–1.87) | 0.005   | 1.52 (1.17–1.97) | 0.002   |
| >5                                     | 2.01 (1.46–2.77) | <0.001  | 2.30 (1.65–3.20) | <0.001  |

HR, hazard ratio; CI, confidence interval; HBV, hepatitis B virus; ALBI, albumin-bilirubin; FIB-4 score, fibrosis-4 score; AFP, alpha-fetoprotein; RFA, radiofrequency ablation.

\*Advanced fibrosis was defined as stage 3 (bridging fibrosis) or stage 4 (cirrhosis).
