# Supplementary material for: Substantial risk of recurrence even after 5 recurrence-free years in early-stage hepatocellular carcinoma patients
Source: PubMed Central journal article supplement — Clin Mol Hepatol. 2020 Sep 11;26(4):516–28. doi: 10.3350/cmh.2020.0016 (PMC7641570; doi:10.3350/cmh.2020.0016), 2020-09-11
Supplement: cmh-2020-0016-suppl4.pdf [file cmh-2020-0016-suppl4.pdf]

**Supplementary Table 4.** Risk factors for further recurrence among patients who received resection and did not experience recurrence within 5 years (n=349)

| Variable                                   | Unadjusted        |           | Multivariable     |           |
|--------------------------------------------|-------------------|-----------|-------------------|-----------|
|                                            | HR (95% CI)       | P-value   | HR (95% CI)       | P-value   |
| Age at 5-year $\geq 60$ vs. $< 60$ (years) | 1.32 (0.86–2.04)  | 0.207     |                   |           |
| Male vs. female                            | 2.33 (1.20–4.52)  | 0.012     | 2.28 (1.18–4.43)  | 0.015     |
| Diabetes                                   | 1.34 (0.7–2.31)   | 0.300     |                   |           |
| HBV vs. others                             | 0.80 (0.44–1.45)  | 0.467     |                   |           |
| Advanced fibrosis on histology* vs. no     | 5.41 (1.70–17.17) | 0.004     | 4.23 (1.32–13.53) | 0.015     |
| Tumor number                               |                   |           |                   |           |
| Single (n=330)                             | Reference         |           |                   |           |
| Two or three (n=19)                        | 1.45 (0.59–3.58)  | 0.425     |                   |           |
| Maximal tumor diameter (cm)                |                   |           |                   |           |
| $\leq 2$ (n=110)                           | Reference         |           |                   |           |
| $> 2$ and $\leq 5$ (n=201)                 | 1.04 (0.65–1.67)  | 0.859     |                   |           |
| $> 5$ (n=38)                               | 0.70 (0.31–1.55)  | 0.378     |                   |           |
| 5-year ALBI grade                          |                   |           |                   |           |
| 1 (n=334)                                  | Reference         |           | Reference         |           |
| $\geq 2$ (n=15)                            | 2.95 (1.35–6.45)  | 0.007     | 1.02 (0.39–2.68)  | 0.972     |
| 5-year AFP (ng/mL)                         |                   |           |                   |           |
| $< 10$ (n=334)                             | Reference         |           | Reference         |           |
| $\geq 10$ (n=15)                           | 6.31 (3.42–11.67) | $< 0.001$ | 4.78 (2.30–9.92)  | $< 0.001$ |

HR, hazard ratio; CI, confidence interval; HBV, hepatitis B virus; ALBI, albumin-bilirubin; AFP, alpha-fetoprotein.

\*Advanced fibrosis was defined as stage 3 (bridging fibrosis) or stage 4 (cirrhosis).
