# Supplementary material for: Substantial risk of recurrence even after 5 recurrence-free years in early-stage hepatocellular carcinoma patients
Source: PubMed Central journal article supplement — Clin Mol Hepatol. 2020 Sep 11;26(4):516–28. doi: 10.3350/cmh.2020.0016 (PMC7641570; doi:10.3350/cmh.2020.0016), 2020-09-11
Supplement: cmh-2020-0016-suppl5.pdf [file cmh-2020-0016-suppl5.pdf]

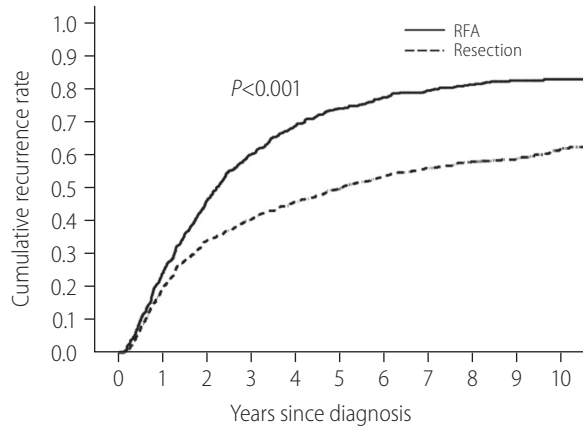

Number at risk

|           |     |     |     |     |     |     |     |     |     |     |     |
|-----------|-----|-----|-----|-----|-----|-----|-----|-----|-----|-----|-----|
| RFA       | 649 | 473 | 327 | 230 | 175 | 138 | 112 | 97  | 80  | 59  | 38  |
| Resection | 789 | 616 | 497 | 440 | 393 | 343 | 294 | 263 | 226 | 117 | 110 |

**Supplementary Figure 1.** Overall cumulative recurrence according to treatment modality. RFA, radiofrequency ablation.
